# Supplementary material for: The weather diaries of the Kirch family: Leipzig, Guben, and Berlin (1677–1774)
Source: Copernicus journal article supplement (doi:10.5194/cp-19-1435-2023), 2023-07-18
Supplement: Supplementary file 1 [file cp-19-1435-2023-supplement.zip]

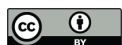

## *Supplement of*

# **The weather diaries of the Kirch family: Leipzig, Guben, and Berlin (1677–1774)**

**Stefan Brönnimann and Yuri Brugnara**

*Correspondence to:* Stefan Brönnimann ([stefan.broennimann@giub.unibe.ch](mailto:stefan.broennimann@giub.unibe.ch))

- [cp-19-1435-2023-supplement-title-page.pdf](#)
- [Formatted\\_Pressure\\_Data.zip](#)
- [Raw\\_Data.zip](#)

The copyright of individual parts of the supplement might differ from the article licence.
